# Supplementary material for: Mathematical Modelling of DNA Replication Reveals a Trade-off between Coherence of Origin Activation and Robustness against Rereplication
Source: PLoS Comput Biol. 2010 May 13;6(5):e1000783. doi: 10.1371/journal.pcbi.1000783 (PMC2869307; doi:10.1371/journal.pcbi.1000783)
Supplement: Figure S6 — Average fraction of activated origins and average number of rereplicating origins in parameter sets generated under different requirements for the constraints Nmin and ρmax. (0.04 MB PDF) [file pcbi.1000783.s012.pdf]

**Supporting Figure 6: Average fraction of activated origins and average number of rereplicating origins in parameter sets generated under different requirements for the constraints  $N_{min}$  and  $\rho_{max}$ .**

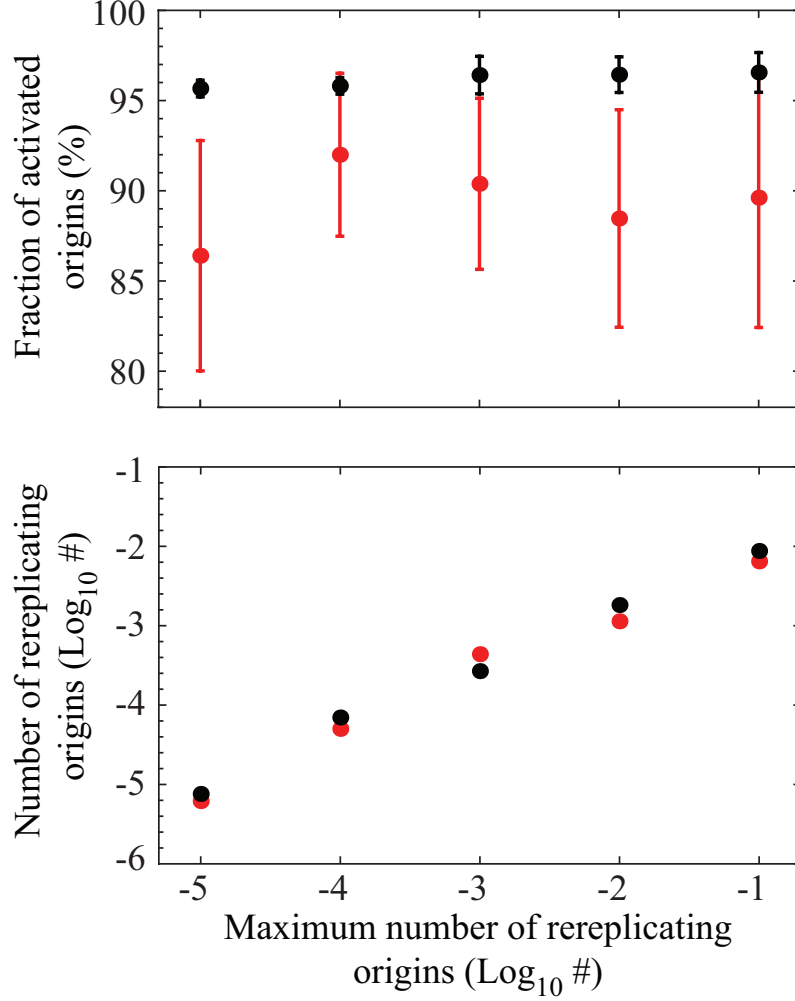

The maximum allowed number of rereplicating origins is varied between  $\rho < 10^{-5}$  and  $\rho < 10^{-1}$  and the minimal required fraction of activated origins distinguishes  $N > 95\%$  (black dots) and  $N > 50\%$  (red dots). Approximately 10 parameter sets are generated for each of combination of conditions. The relaxed requirements for the number of activated origins of 50%, as well as the relaxed requirement for the number of rereplicating origins of  $10^{-1}$  is never exhausted. But the more stringent the requirement for both systems properties, the more these are exploited.
