# Supplementary material for: Mathematical Modelling of DNA Replication Reveals a Trade-off between Coherence of Origin Activation and Robustness against Rereplication
Source: PubMed Central journal article supplement (PMC2869307; doi:10.1371/journal.pcbi.1000783), 2010-05-13
Supplement: pcbi.1000783.s005.pdf [file pcbi.1000783.s005.pdf]

## Supporting Table 2: Kinetic parameters of the mathematical model

| Parameter                                           | Symbol        | Value             | Unit               |            |
|-----------------------------------------------------|---------------|-------------------|--------------------|------------|
| <b><i>Licensing</i></b>                             |               |                   |                    |            |
| Binding of Cdc6                                     | $k_1$         | $2 \times 10^5$   | $(\text{Ms})^{-1}$ | <i>a,b</i> |
| Dissociation of Cdc6                                | $k_{-1}$      | 0.2               | $\text{s}^{-1}$    | <i>a,b</i> |
| Degradation of Cdc6                                 | $\delta_2$    | 0.005             | $\text{s}^{-1}$    | <i>a,c</i> |
| Binding of Cdt1-Mcm2-7                              | $k_3$         | $1 \times 10^5$   | $(\text{Ms})^{-1}$ | <i>a</i>   |
| Dissociation of Cdt1-Mcm2-7                         | $k_{-3}$      | 0.05              | $\text{s}^{-1}$    | <i>a</i>   |
| Binding of Cdt1 and Mcm2-7                          | $k_4$         | $2 \times 10^5$   | $(\text{Ms})^{-1}$ | <i>a</i>   |
| Dissociation of Cdt1 and Mcm2-7                     | $k_{-4}$      | 0.02              | $\text{s}^{-1}$    | <i>a</i>   |
| Binding of Cdt1 and Mcm2-7p                         | $k_5$         | $2 \times 10^3$   | $(\text{Ms})^{-1}$ | <i>a</i>   |
| Dissociation of Cdt1 and Mcm2-7p                    | $k_{-5}$      | 2                 | $\text{s}^{-1}$    | <i>a</i>   |
| Phosphorylation of (Cdt1-)Mcm2-7                    | $\alpha_6$    | 0.002             | $\text{s}^{-1}$    | <i>a</i>   |
| Export of Cdt1                                      | $k_7$         | 0.005             | $\text{s}^{-1}$    | <i>a</i>   |
| Export of (Cdt1-)Mcm2-7p                            | $k_8$         | 0.005             | $\text{s}^{-1}$    | <i>a</i>   |
| Dissociation of Cdc6, Cdt1                          | $k_9$         | 0.167             | $\text{s}^{-1}$    | <i>a</i>   |
| <b><i>S-Cdk activation</i></b>                      |               |                   |                    |            |
| Binding of G <sub>1</sub> -Cdk and S-Cdk-Sic1       | $k_{24}$      | $5 \times 10^5$   | $(\text{Ms})^{-1}$ | <i>a</i>   |
| Dissociation of G <sub>1</sub> -Cdk and S-Cdk-Sic1  | $k_{-24}$     | 5                 | $\text{s}^{-1}$    | <i>a</i>   |
| Phosphorylation of S-Cdk-Sic1                       | $\alpha_{24}$ | 0.1               | $\text{s}^{-1}$    | <i>a</i>   |
| Binding of Cdc14 and S-Cdk-Sic1                     | $k_{25}$      | $5 \times 10^4$   | $(\text{Ms})^{-1}$ | <i>a</i>   |
| Dissociation of Cdc14 and S-Cdk-Sic1                | $k_{-25}$     | 0.5               | $\text{s}^{-1}$    | <i>a</i>   |
| Dephosphorylation of S-Cdk-Sic1                     | $\beta_{25}$  | 2.5               | $\text{s}^{-1}$    | <i>a</i>   |
| Binding of Sic1( <i>ip</i> ) and S-Cdk              | $k_{26}$      | $2.5 \times 10^6$ | $(\text{Ms})^{-1}$ | <i>a,d</i> |
| Dissociation of Sic1( <i>ip</i> ) and S-Cdk         | $k_{-26}$     | 0.0092            | $\text{s}^{-1}$    | <i>a,e</i> |
| Degradation of Sic1( <i>ip</i> ), $i = 6, \dots, 9$ | $\delta_{27}$ | 1                 | $\text{s}^{-1}$    | <i>a</i>   |

<sup>a</sup>Fixed, not optimized parameter value

<sup>b</sup>Feng et al (2000)

<sup>c</sup>Drury et al (2000)

<sup>d</sup>Barberis et al (2007)

<sup>e</sup>Barberis et al (2005)

| <b>11-3-2 activator formation</b>                                                                         |                   |                      |                    |          |
|-----------------------------------------------------------------------------------------------------------|-------------------|----------------------|--------------------|----------|
| Binding of S-Cdk and Sld2/3                                                                               | $k_{17}/k_{19}$   | $6.4 \times 10^4$    | $(\text{Ms})^{-1}$ | <i>f</i> |
| Dissociation of S-Cdk and Sld2/3                                                                          | $k_{-17}/k_{-19}$ | $7.9 \times 10^{-3}$ | $\text{s}^{-1}$    | <i>f</i> |
| Phosphorylation of Sld2/3                                                                                 | $\alpha_{17}$     | 0.2                  | $\text{s}^{-1}$    | <i>f</i> |
| Phosphorylation of Thr84 in Sld2                                                                          | $\alpha_{19}$     | 0.9                  | $\text{s}^{-1}$    | <i>f</i> |
| Binding of Cdc14 and Sld2/3                                                                               | $k_{18}/k_{20}$   | $1.1 \times 10^3$    | $(\text{Ms})^{-1}$ | <i>f</i> |
| Dissociation of Cdc14 and Sld2/3                                                                          | $k_{-18}/k_{-20}$ | $9.9 \times 10^{-3}$ | $\text{s}^{-1}$    | <i>f</i> |
| Dephosphorylation of Sld2/3                                                                               | $\beta_{18}$      | 0.3                  | $\text{s}^{-1}$    | <i>f</i> |
| Dephosphorylation of Thr84 in Sld2                                                                        | $\beta_{20}$      | 0.5                  | $\text{s}^{-1}$    | <i>f</i> |
| Binding of Sld2p and Dpb11                                                                                | $k_{21}$          | $5.0 \times 10^5$    | $(\text{Ms})^{-1}$ | <i>f</i> |
| Dissociation of Sld2p and Dpb11                                                                           | $k_{-21}$         | 0.005                | $\text{s}^{-1}$    | <i>a</i> |
| Binding of Sld3p and Dpb11                                                                                | $k_{22}$          | $1.7 \times 10^5$    | $(\text{Ms})^{-1}$ | <i>f</i> |
| Dissociation of Sld3p and Dpb11                                                                           | $k_{-22}$         | 0.005                | $\text{s}^{-1}$    | <i>a</i> |
| <b>Firing</b>                                                                                             |                   |                      |                    |          |
| Binding of S-Cdk and Mcm2-7                                                                               | $k_{10}$          | $7.3 \times 10^4$    | $(\text{Ms})^{-1}$ | <i>f</i> |
| Dissociation of S-Cdk and Mcm2-7                                                                          | $k_{-10}$         | $8.2 \times 10^{-3}$ | $\text{s}^{-1}$    | <i>f</i> |
| Phosphorylation of Mcm2-7 by S-Cdk                                                                        | $\alpha_{10}$     | 0.1                  | $\text{s}^{-1}$    | <i>f</i> |
| Binding of Ddk and Mcm2-7                                                                                 | $k_{11}$          | $3.0 \times 10^4$    | $(\text{Ms})^{-1}$ | <i>f</i> |
| Dissociation of Ddk and Mcm2-7                                                                            | $k_{-11}$         | 0.01                 | $\text{s}^{-1}$    | <i>f</i> |
| Phosphorylation of Mcm2-7 by Ddk                                                                          | $\alpha_{11}$     | 0.8                  | $\text{s}^{-1}$    | <i>f</i> |
| Binding of Cdc45                                                                                          | $k_{12}$          | $1.1 \times 10^5$    | $(\text{Ms})^{-1}$ | <i>f</i> |
| Dissociation of Cdc45                                                                                     | $k_{-12}$         | 0.005                | $\text{s}^{-1}$    | <i>b</i> |
| Binding of Sld3p-Dpb11-Sld2p                                                                              | $k_{13}$          | $5 \times 10^5$      | $(\text{Ms})^{-1}$ | <i>f</i> |
| Dissociation of Sld3p-Dpb11-Sld2p                                                                         | $k_{-13}$         | 0.005                | $\text{s}^{-1}$    | <i>a</i> |
| Binding of GINS and polymerase                                                                            | $k_{14}$          | $3.3 \times 10^5$    | $(\text{Ms})^{-1}$ | <i>f</i> |
| Dissociation of GINS and polymerase                                                                       | $k_{-14}$         | 0.005                | $\text{s}^{-1}$    | <i>a</i> |
| Dissociation of 11-3-2 activator                                                                          | $k_{15}$          | 0.9                  | $\text{s}^{-1}$    | <i>f</i> |
| Dissociation of Mcm2-7, Cdc45, GINS,<br>and polymerase; resetting of origins<br>after replicon completion | $k_{16}$          | 0.005                | $\text{s}^{-1}$    | <i>a</i> |
| Binding of S-Cdk and Orc6                                                                                 | $k_{23}$          | $6.3 \times 10^3$    | $(\text{Ms})^{-1}$ | <i>f</i> |
| Dissociation of S-Cdk and Orc6                                                                            | $k_{-23}$         | $9.2 \times 10^{-3}$ | $\text{s}^{-1}$    | <i>f</i> |
| Phosphorylation of Orc6                                                                                   | $\alpha_{23}$     | 0.7                  | $\text{s}^{-1}$    | <i>f</i> |

<sup>a</sup>Fixed, not optimized parameter value

<sup>f</sup>Parameter value from a reference set, selected from all 109 optimized parameter sets

## References

Barberis M, Klipp E, Vanoni M, Alberghina L (2007) Cell size at S phase initiation: an emergent property of the G1/S network. *PLoS Comput Biol* **3**: e64

Barberis M, De Gioia L, Ruzzene M, Sarno S, Coccetti P, Fantucci P, Vanoni M, Alberghina L (2005) The yeast cyclin-dependent kinase inhibitor Sic1 and mammalian p27Kip1 are functional homologues with a structurally conserved inhibitory domain. *Biochem J* **387**: 639-647

Drury LS, Perkins G, Diffley JF (2000) The cyclin-dependent kinase Cdc28p regulates distinct modes of Cdc6p proteolysis during the budding yeast cell cycle. *Curr Biol* **10**: 231-240

Feng L, Wang B, Driscoll B, Jong A (2000) Identification and characterization of *Saccharomyces cerevisiae* Cdc6 DNA-binding properties. *Mol Biol Cell* **11**: 1673-1685
