# Supplementary material for: Mathematical Modelling of DNA Replication Reveals a Trade-off between Coherence of Origin Activation and Robustness against Rereplication
Source: PubMed Central journal article supplement (PMC2869307; doi:10.1371/journal.pcbi.1000783), 2010-05-13
Supplement: pcbi.1000783.s006.pdf [file pcbi.1000783.s006.pdf]

**Supporting Table 3: Mean value and standard deviation of optimized parameters**

| Parameter         | Unit               | Mean value            | Standard deviation    | rel. Std |
|-------------------|--------------------|-----------------------|-----------------------|----------|
| $k_{10}$          | (Ms) <sup>-1</sup> | $7.19 \times 10^4$    | $2.66 \times 10^4$    | 0.37     |
| $Kd_{10}$         | M                  | $2.86 \times 10^{-7}$ | $9.50 \times 10^{-7}$ | 3.32     |
| $\alpha_{10}$     | s <sup>-1</sup>    | 0.24                  | 0.31                  | 1.26     |
| $k_{11}$          | (Ms) <sup>-1</sup> | $3.80 \times 10^4$    | $2.95 \times 10^4$    | 0.78     |
| $Kd_{11}$         | M                  | $8.80 \times 10^{-7}$ | $1.57 \times 10^{-6}$ | 1.78     |
| $\alpha_{11}$     | s <sup>-1</sup>    | 0.31                  | 0.34                  | 1.08     |
| $k_{12}$          | (Ms) <sup>-1</sup> | $2.27 \times 10^5$    | $1.69 \times 10^5$    | 0.74     |
| $Kd_{12}$         | M                  | $5.14 \times 10^{-8}$ | $6.34 \times 10^{-8}$ | 1.23     |
| $k_{13}$          | (Ms) <sup>-1</sup> | $4.65 \times 10^5$    | $8.87 \times 10^{-4}$ | 0.19     |
| $Kd_{13}$         | M                  | $1.21 \times 10^{-8}$ | $8.43 \times 10^{-9}$ | 0.70     |
| $k_{14}$          | (Ms) <sup>-1</sup> | $2.44 \times 10^5$    | $1.59 \times 10^5$    | 0.65     |
| $Kd_{14}$         | M                  | $4.28 \times 10^{-8}$ | $5.18 \times 10^{-8}$ | 1.21     |
| $k_{15}$          | s <sup>-1</sup>    | 0.27                  | 0.29                  | 1.10     |
| $k_{17}/k_{19}$   | (Ms) <sup>-1</sup> | $7.58 \times 10^4$    | $2.88 \times 10^4$    | 0.38     |
| $Kd_{17}/Kd_{19}$ | M                  | $2.53 \times 10^{-7}$ | $3.52 \times 10^{-7}$ | 1.39     |
| $\alpha_{17}$     | s <sup>-1</sup>    | 0.31                  | 0.33                  | 1.07     |
| $\alpha_{19}$     | s <sup>-1</sup>    | 0.28                  | 0.33                  | 1.17     |
| $k_{18}/k_{20}$   | (Ms) <sup>-1</sup> | $7.07 \times 10^3$    | $7.41 \times 10^3$    | 1.05     |
| $Kd_{18}/Kd_{20}$ | M                  | $3.36 \times 10^{-6}$ | $3.02 \times 10^{-6}$ | 0.90     |
| $\beta_{18}$      | s <sup>-1</sup>    | 1.24                  | 1.55                  | 1.24     |
| $\beta_{20}$      | s <sup>-1</sup>    | 1.50                  | 1.48                  | 0.98     |
| $k_{21}$          | (Ms) <sup>-1</sup> | $2.70 \times 10^5$    | $1.70 \times 10^5$    | 0.63     |
| $Kd_{21}$         | M                  | $3.65 \times 10^{-8}$ | $3.87 \times 10^{-8}$ | 1.06     |
| $k_{22}$          | (Ms) <sup>-1</sup> | $2.56 \times 10^5$    | $1.74 \times 10^5$    | 0.68     |
| $Kd_{22}$         | M                  | $4.89 \times 10^{-8}$ | $7.60 \times 10^{-8}$ | 1.56     |
| $k_{23}$          | (Ms) <sup>-1</sup> | $1.15 \times 10^4$    | $4.94 \times 10^3$    | 0.43     |
| $Kd_{23}$         | M                  | $1.18 \times 10^{-6}$ | $1.48 \times 10^{-6}$ | 1.26     |
| $\alpha_{23}$     | s <sup>-1</sup>    | 0.44                  | 0.36                  | 0.83     |
