# Supplementary material for: Mathematical Modelling of DNA Replication Reveals a Trade-off between Coherence of Origin Activation and Robustness against Rereplication
Source: PubMed Central journal article supplement (PMC2869307; doi:10.1371/journal.pcbi.1000783), 2010-05-13

## Supporting Figure 2: Distribution of optimized parameter values of the 11-3-2 activator module

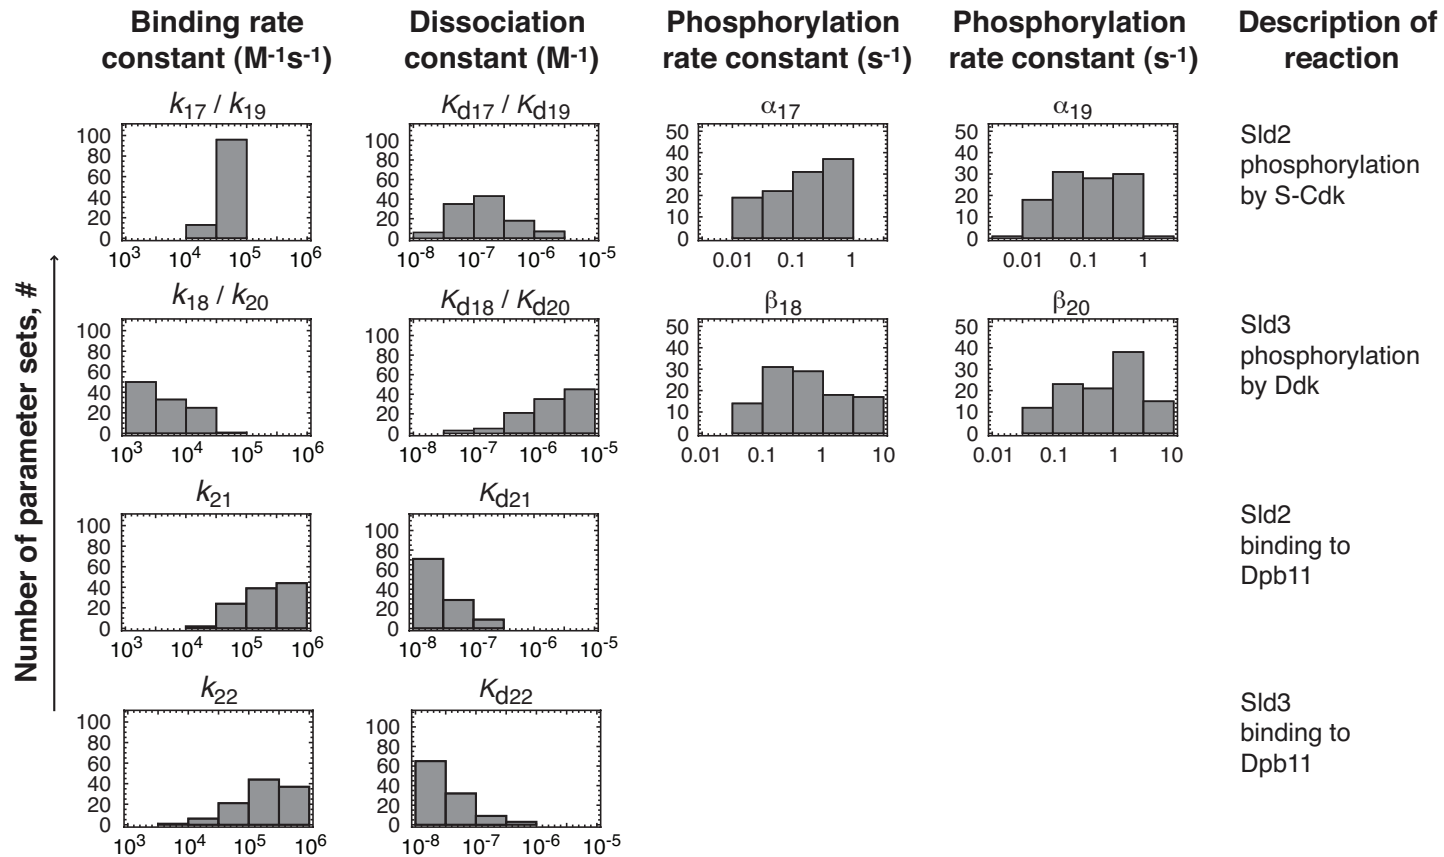

Supplement: pcbi.1000783.s008.pdf [file pcbi.1000783.s008.pdf]
