# Supplementary material for: Mathematical Modelling of DNA Replication Reveals a Trade-off between Coherence of Origin Activation and Robustness against Rereplication
Source: PubMed Central journal article supplement (PMC2869307; doi:10.1371/journal.pcbi.1000783), 2010-05-13
Supplement: pcbi.1000783.s009.pdf [file pcbi.1000783.s009.pdf]

Supporting Figure 3: Control coefficients of the kinetic parameters on the systems properties  $N$ ,  $\rho$ ,  $\tau$  and  $\Delta$  calculated with all generated parameter sets

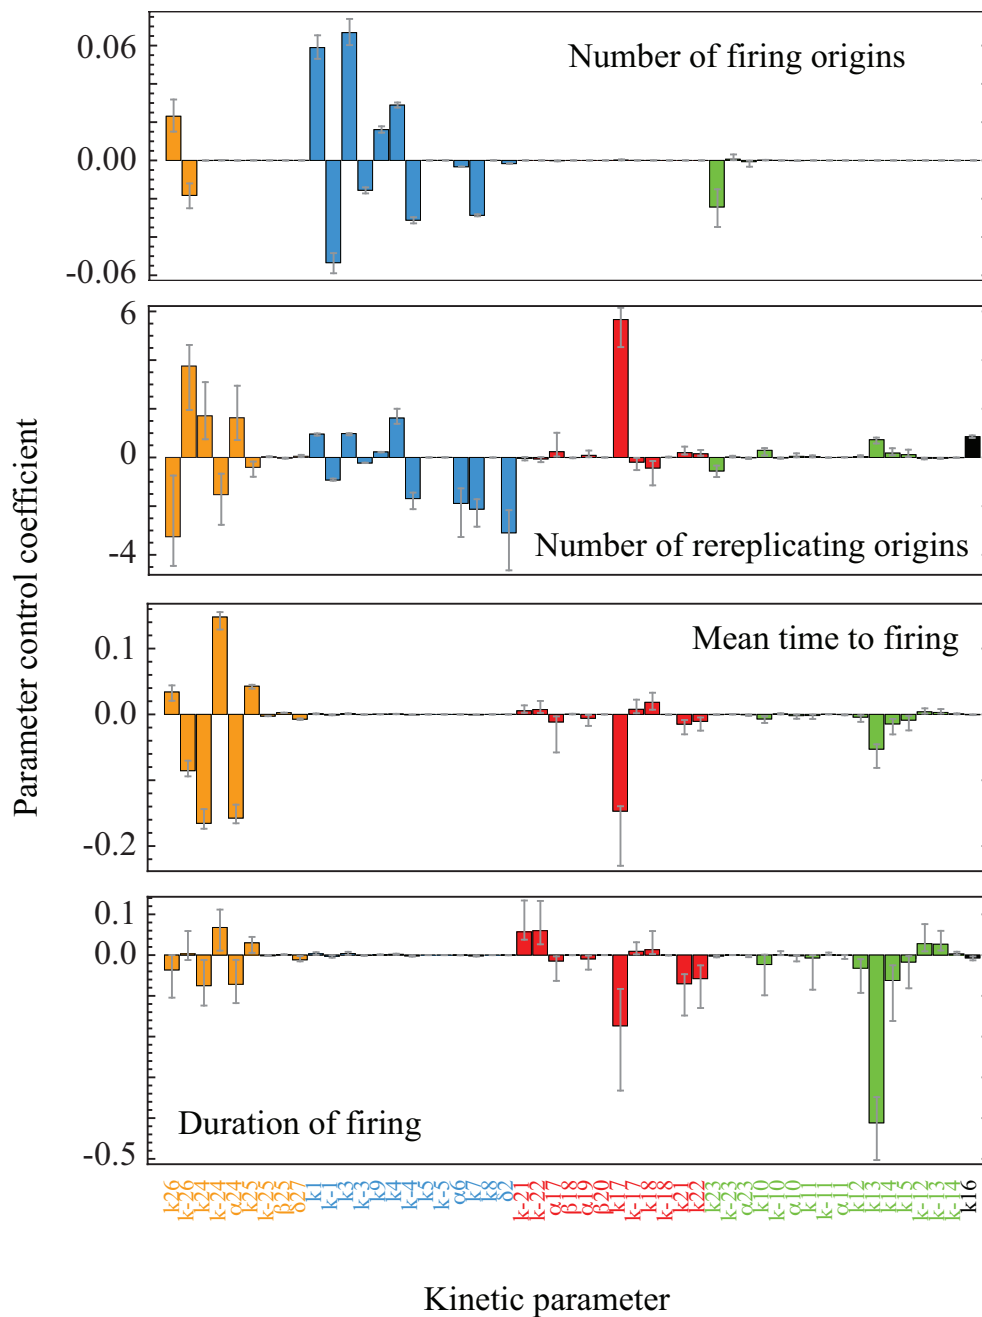

Shown is the mean value and standard deviation of control coefficients calculated for all optimized parameter sets.
