# Supplementary material for: Mathematical Modelling of DNA Replication Reveals a Trade-off between Coherence of Origin Activation and Robustness against Rereplication
Source: PubMed Central journal article supplement (PMC2869307; doi:10.1371/journal.pcbi.1000783), 2010-05-13
Supplement: pcbi.1000783.s010.pdf [file pcbi.1000783.s010.pdf]

## Supporting Figure 4: Initiation of DNA replication without catalytic replacement of the 11-3-2 activator complex

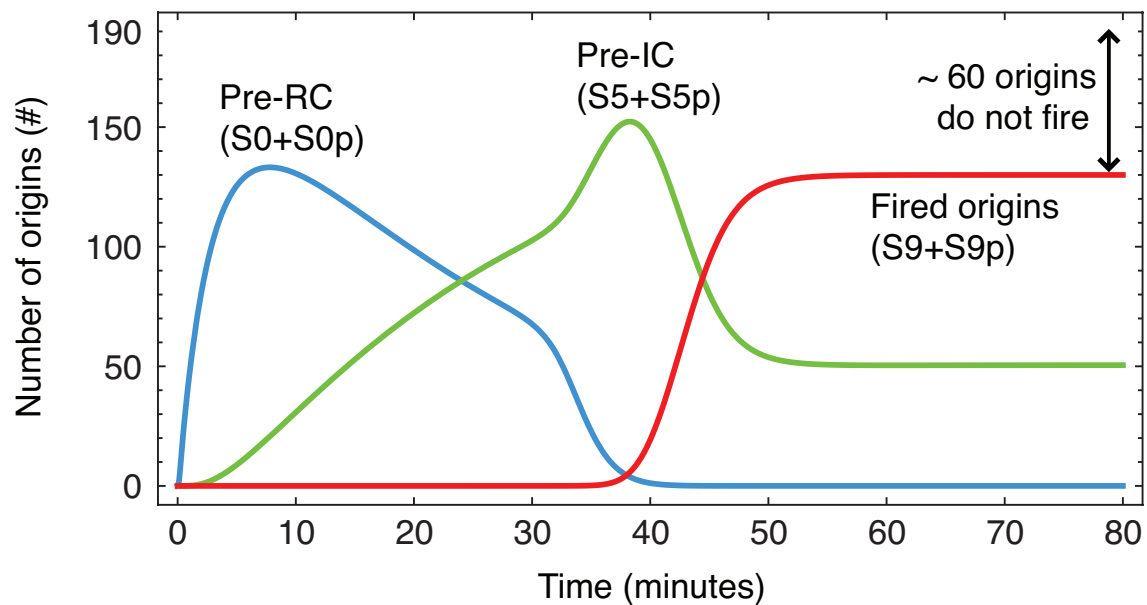

Incomplete initiation of replication origins would result, if the 11-3-2 activator complex remains associated with the replication origins, because the number of the 11-3-2 activator complexes is limited by the reported low number of Sld3, of only 130 molecules (Ghaemmaghami et al, 2003). A catalytic function of the 11-3-2 activator complex is proposed, guided by the experimental observation that the 11-3-2 activator complex is not part of the replisome and not needed for ongoing DNA synthesis. A replacement of the 11-3-2 activator complex from the origins after the loading of the GINS complex associated with the DNA polymerase allows a recycling and the use of one 11-3-2 activator complex at several origins.
