# Supplementary material for: Mathematical Modelling of DNA Replication Reveals a Trade-off between Coherence of Origin Activation and Robustness against Rereplication
Source: PubMed Central journal article supplement (PMC2869307; doi:10.1371/journal.pcbi.1000783), 2010-05-13
Supplement: pcbi.1000783.s014.pdf [file pcbi.1000783.s014.pdf]

## Supporting Figure 8: Firing rate under different S-Cdk concentrations.

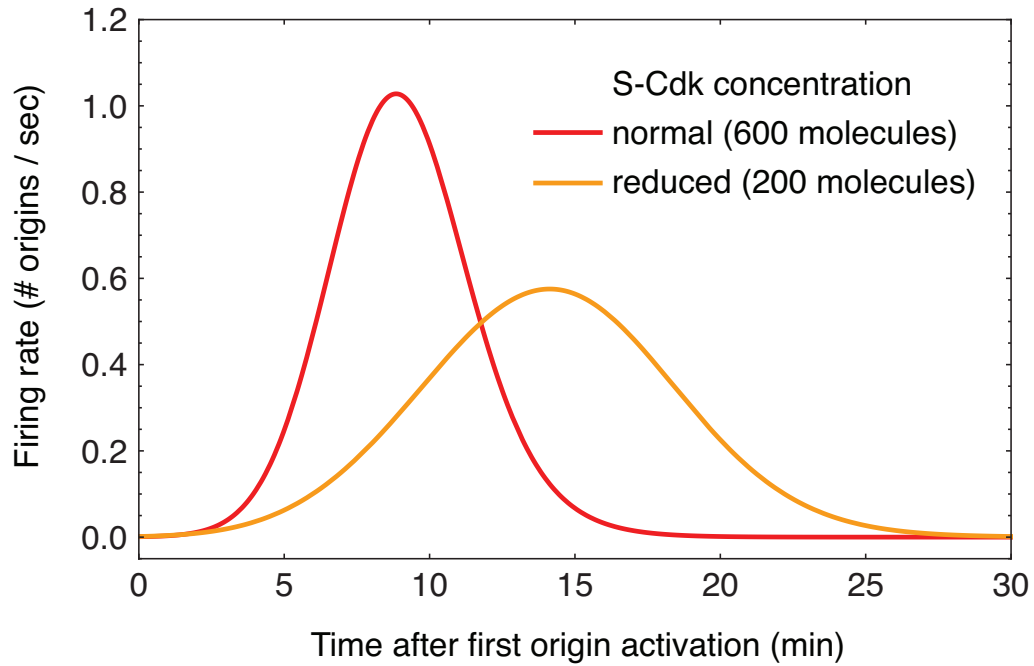

A short duration of origins firing is robustly obtained for a wide range of S-Cdk concentrations.
