# Supplementary material for: Mathematical Modelling of DNA Replication Reveals a Trade-off between Coherence of Origin Activation and Robustness against Rereplication
Source: PLoS Comput Biol. 2010 May 13;6(5):e1000783. doi: 10.1371/journal.pcbi.1000783 (PMC2869307; doi:10.1371/journal.pcbi.1000783)
Supplement: Table S1 — Protein numbers and concentrations (0.03 MB PDF) [file pcbi.1000783.s004.pdf]

## Supporting Table 1: Protein numbers and concentrations

| Protein               | Value               | Unit  | Reference/Remarks                                                          |
|-----------------------|---------------------|-------|----------------------------------------------------------------------------|
| Cdc6                  | 700, 233            | #, nM |                                                                            |
| Cdt1                  | 2200, 733           | #, nM | <i>a</i>                                                                   |
| Mcm2-7                | 2000, 667           | #, nM | <i>a</i>                                                                   |
| Sld2                  | 660, 220            | #, nM | <i>a</i>                                                                   |
| Sld3                  | 130, 43             | #, nM | <i>a</i>                                                                   |
| Dpb11                 | 540, 180            | #, nM | <i>a</i>                                                                   |
| Cln1,2                | 1500, 500           | #, nM | <i>a</i>                                                                   |
| Sic1                  | 800, 267            | #, nM | <i>a</i>                                                                   |
| Clb5,6                | 600, 200            | #, nM | <i>a</i> ([Clb5] = 520); <i>b</i> ( $\frac{[Clb6]}{[Clb5]} \approx 10\%$ ) |
| Cdc7                  | 1600, 533           | #, nM | <i>a</i>                                                                   |
| Cdc14                 | 360, 120            | #, nM | <i>a</i>                                                                   |
| Cdc45                 | 1700, 567           | #, nM | <i>a</i>                                                                   |
| GIN5                  | 1500, 500           | #, nM | <i>a</i>                                                                   |
| Early origins         | 190                 | #     | <i>c</i>                                                                   |
| Volume of the nucleus | $5 \times 10^{-15}$ | l     | <i>d</i>                                                                   |

<sup>a</sup>Ghaemmamghami et al (2003)

<sup>b</sup>Cross et al (2002)

<sup>c</sup>Lengronne et al (2001)

<sup>d</sup>Jorgensen et al (2007)

## References

Cross FR, Archambault V, Miller M, Klovstad M (2002) Testing a mathematical model of the yeast cell cycle. *Mol Biol Cell* **13**: 52-70

Ghaemmamghami S, Huh WK, Bower K, Howson RW, Belle A, Dephoure N, O'Shea EK, Weissman JS (2003) Global analysis of protein expression in yeast. *Nature* **425**: 737-741

Jorgensen P, Edgington NP, Schneider BL, Rupes I, Tyers M, Futcher B (2007) The size of the nucleus increases as yeast cells grow. *Mol Biol Cell* **18**: 3523-3532

Lengronne A, Pasero P, Bensimon A, Schwob E (2001) Monitoring S phase progression globally and locally using BrdU incorporation in TK(+) yeast strains. *Nucleic Acids Res* **29**: 1433-1442
